# Supplementary material
Source: Preprints.org preprint supplement (doi:10.20944/preprints202110.0066.v1)
Supplement: Supplementary file 3 [file supplementary]

## Sheet: M6 markers
include in manuscript	Intertek marker name	CIP marker name		flanking sequence
yes	snpST0049	M6F1R4_672	chr11	AGATACGCCACTCCACATAAGGCAAYTCCTAAAACAAAGAAACATGAGCT[G/A]CTCGGGRTCACCACTTAAYAAAGATTTTAGTTAGATAARGACAGAATACA
yes	snpST0050	M6F1R4_679	chr11	CCACTCCACATAAGGCAAYTCCTAAAACAAAGAAACATGAGCTRCTCGGG[G/A]TCACCACTTAAYAAAGATTTTAGTTAGATAARGACAGAATACACAAAATC
yes	snpST0051	M6F1R4_691	chr11	AGGCAAYTCCTAAAACAAAGAAACATGAGCTRCTCGGGRTCACCACTTAA[C/T]AAAGATTTTAGTTAGATAARGACAGAATACAAAATCCACT….ATCRCA
yes	snpST0052	M6F1R4_711	chr11	AAACATGAGCTRCTCGGGRTCACCACTTAAYAAAGATTTTAGTTAGATAA[A/G]GACAGAATACAAAATCCACT….ATCRCATTTATCACGGATGGGTTCCA
yes	snpST0053	M6F1R4_732	chr11	ACCACTTAAYAAAGATTTTAGTTAGATAARGACAGAATACAAAATCCACT[…./AACG]ATCRCATTTATCACGGATGGGTTCCAATTAGACGTGCTAACTAGTTAGGG
yes	snpST0054	M6F1R4_739	chr11	ACTTAAYAAAGATTTTAGTTAGATAARGACAGAATACAAAATCCACT….ATC[A/G]CATTTATCACGGATGGGTTCCAATTAGACGTGCTAACTAGTTAGGGATTC
yes	snpST0071	M6F1R4_797	chr11	ACGGATGGGTTCCAATTAGACGTGCTAACTAGTTAGGGATTCAAATTCA[C/A]RATTGTATTAAACCCGGATRTACATATACAGGGAAGYTTTAACCACACAT
yes	snpST0072	M6F1R4_798	chr11	ACGGATGGGTTCCAATTAGACGTGCTAACTAGTTAGGGATTCAAATTCAM[A/G]ATTGTATTAAACCCGGATRTACATATACAGGGAAGYTTTAACCACACATG
yes	snpST0073	M6F1R4_817	chr11	ACGTGCTAACTAGTTAGGGATTCAAATTCAMRATTGTATTAAACCCGGAT[G/A]TACATATACAGGGAAGYTTTAACCACACATGMAAGGTTCAGATATCCAWG
no	snpST0074	M6F1R4_834	chr11	GGATTCAAATTCAMRATTGTATTAAACCCGGATRTACATATACAGGGAAG[C/T]TTTAACCACACATGMAAGGTTCAGATATCCAWGCCCCTYCC
no	snpST0075	M6F1R4_849	chr11	RATTGTATTAAACCCGGATRTACATATACAGGGAAGYTTTAACCACACATG[C/A]AAGGTTCAGATATCCAWGCCCCTYCCCCAGTCAACCTTTTTC
no	snpST0076	M6F1R4_938	chr11	GTCAACCTTTTTCCTTTCTCCTWTATGGTGGATSATTCTTCAAAATATAG[C/T]ACATKCAACTGAYTCTTTCTTCTATCACCRCAAAAAGACAACAGCAATTG
no	snpST0077	M6F1R4_943	chr11	CCTTTTTCCTTTCTCCTWTATGGTGGATSATTCTTCAAAATATAGYACAT[T/G]CAACTGAYTCTTTCTTCTATCACCRCAAAAAGACAACAGCAATTGAATCA
no	snpST0078	M6F1R4_951	chr11	CTTTCTCCTWTATGGTGGATSATTCTTCAAAATATAGYACATKCAACTGA[C/T]TCTTTCTTCTATCACCRCAAAAAGACAACAGCAATTGAATCATTGRAGTTA
no	snpST0079	M6F1R4_967	chr11	GATSATTCTTCAAAATATAGYACATKCAACTGAYTCTTTCTTCTATCACC[G/A]CAAAAAGACAACAGCAATTGAATCATTGRAGTTACACTACACATGCCACA
no	snpST0080	M6F1R4_996	chr11	CTGAYTCTTTCTTCTATCACCRCAAAAAGACAACAGCAATTGAATCATTG[A/G]AGTTACACTACACATGCCACAAACTTTCAAAATTACATGCAGAAAAGACA

## Sheet: M6 results revised
Clone	population_group	snpST0049	snpST0050	snpST0051	snpST0052	snpST0053	snpST0054	snpST0071	snpST0072	snpST0073	snpST0074	snpST0075	snpST0076	snpST0077	snpST0078	snpST0079	snpST0080	pheno	HRM M6P2F1R1 group	M6P2 Ry peak
CIP300056.33	LTVR	Uncallable	Uncallable	C:C	G:A	AACG:-	A:A	Uncallable	Uncallable	G:G	Uncallable	C:C	C:C	?	C:C	Uncallable	Uncallable	Extreme resistance	a	yes
CIP300066.11	LTVR	Uncallable	A:G	T:C	G:A	AACG:-	G:A	C:C	Uncallable	G:G	Uncallable	A:C	C:C	G:T	C:C	Uncallable	Uncallable	Extreme resistance	c	yes
CIP300101.11	LTVR	Uncallable	A:G	C:C	G:A	AACG:-	G:A	?	Uncallable	G:G	Uncallable	A:C	C:C	?	?	Uncallable	Uncallable	Extreme resistance	negative
CIP379706.27	LTVR	Uncallable	G:G	C:C	G:A	AACG:-	A:A	C:C	Uncallable	G:G	Uncallable	C:C	C:C	?	C:C	Uncallable	Uncallable	Extreme resistance	a	yes
CIP388611.22	LTVR	Uncallable	A:G	C:C	G:A	AACG:-	G:A	C:C	Uncallable	G:G	Uncallable	A:C	C:C	G:T	C:C	Uncallable	Uncallable	Extreme Resistance	a	yes
CIP388615.22	LTVR	Uncallable	A:G	C:C	G:A	AACG:-	G:A	C:C	Uncallable	G:G	Uncallable	A:C	C:C	?	C:C	Uncallable	Uncallable	Extreme Resistance	a	yes
CIP389468.3	LTVR	Uncallable	A:G	T:C	G:A	AACG:-	G:A	C:C	Uncallable	G:G	Uncallable	A:C	C:C	G:T	C:C	Uncallable	Uncallable	Extreme Resistance	c	yes
CIP390478.9	LTVR	Uncallable	A:G	C:C	G:A	AACG:-	G:A	C:C	Uncallable	G:G	Uncallable	A:C	C:C	?	C:C	Uncallable	Uncallable	Extreme resistance	a	yes
CIP390637.1	LTVR	Uncallable	G:G	C:C	G:A	AACG:-	A:A	C:C	Uncallable	G:G	Uncallable	C:C	C:C	?	C:C	Uncallable	Uncallable	Extreme Resistance	a	yes
CIP391180.6	LTVR	Uncallable	A:G	T:C	G:A	AACG:-	G:A	C:C	Uncallable	G:G	Uncallable	A:C	C:C	G:T	C:C	Uncallable	Uncallable	Extreme Resistance	unkown	yes
CIP391207.2	LTVR	Uncallable	G:G	C:C	G:A	AACG:-	A:A	C:C	Uncallable	G:G	Uncallable	C:C	C:C	T:T	C:C	Uncallable	Uncallable	Extreme Resistance	a	yes
CIP391382.18	LTVR	Uncallable	A:G	C:C	G:A	AACG:-	G:A	C:C	Uncallable	G:G	Uncallable	A:C	C:C	G:T	C:C	Uncallable	Uncallable	Extreme resistance	a	yes
CIP392025.7	LTVR	Uncallable	A:G	C:C	G:A	AACG:-	G:A	C:C	Uncallable	G:G	Uncallable	A:C	C:C	?	C:C	Uncallable	Uncallable	Extreme Resistance	negative
CIP392739.4	LTVR	Uncallable	A:G	C:C	G:A	AACG:-	G:A	C:C	Uncallable	G:G	Uncallable	A:C	C:C	G:T	C:C	Uncallable	Uncallable	Extreme Resistance	f	yes
CIP392740.4	LTVR	Uncallable	A:G	T:C	G:A	AACG:-	G:A	C:C	Uncallable	G:G	Uncallable	A:C	C:C	G:T	C:C	Uncallable	Uncallable	Extreme Resistance	e	yes
CIP392759.1	LTVR	Uncallable	A:G	C:C	G:A	AACG:-	G:A	C:C	Uncallable	G:G	Uncallable	A:C	C:C	G:T	C:C	Uncallable	Uncallable	Extreme Resistance	e	yes
CIP392780.1	LTVR	Uncallable	G:G	C:C	G:A	AACG:-	A:A	C:C	Uncallable	G:G	Uncallable	C:C	C:C	T:T	C:C	Uncallable	Uncallable	Extreme resistance	a	yes
CIP392820.1	LTVR	Uncallable	A:G	T:C	G:A	AACG:-	G:A	C:C	Uncallable	G:G	Uncallable	A:C	C:C	G:T	C:C	Uncallable	Uncallable	Extreme Resistance	c	yes
CIP393613.2	LTVR	Uncallable	G:G	C:C	G:A	AACG:-	A:A	C:C	Uncallable	G:G	Uncallable	C:C	C:C	T:T	C:C	Uncallable	Uncallable	Extreme Resistance	f	yes
CIP393615.6	LTVR	Uncallable	G:G	C:C	G:A	AACG:-	A:A	C:C	Uncallable	G:G	Uncallable	C:C	C:C	T:T	C:C	Uncallable	Uncallable	Extreme Resistance	a	yes
CIP393617.1	LTVR	Uncallable	A:G	C:C	G:A	AACG:-	G:A	C:C	Uncallable	G:G	Uncallable	A:C	C:C	?	C:C	Uncallable	Uncallable	Extreme Resistance	negative
CIP393708.31	LTVR	Uncallable	A:G	C:C	G:A	AACG:-	G:A	C:C	Uncallable	G:G	Uncallable	A:C	C:C	G:T	C:C	Uncallable	Uncallable	Extreme Resistance	e	yes
CIP394034.7	LTVR	Uncallable	A:G	T:C	G:A	AACG:-	G:A	C:C	Uncallable	G:G	Uncallable	A:C	C:C	G:T	C:C	Uncallable	Uncallable	Hypersensitive	e	yes
CIP394600.52	LTVR	Uncallable	G:G	C:C	G:A	AACG:-	A:A	C:C	Uncallable	G:G	Uncallable	C:C	C:C	T:T	C:C	Uncallable	Uncallable	Extreme Resistance	a	yes
CIP394613.139	LTVR	Uncallable	A:G	T:C	G:A	AACG:-	G:A	C:C	Uncallable	G:G	Uncallable	A:C	C:C	G:T	C:C	Uncallable	Uncallable	Extreme Resistance	h	yes
CIP394613.32	LTVR	Uncallable	A:G	C:C	G:A	AACG:-	G:A	C:C	Uncallable	G:G	Uncallable	A:C	C:C	G:T	C:C	Uncallable	Uncallable	Extreme Resistance	a	yes
CIP394614.117	LTVR	Uncallable	A:G	C:C	G:A	AACG:-	G:A	C:C	Uncallable	G:G	Uncallable	A:C	C:C	G:T	C:C	Uncallable	Uncallable	Extreme Resistance	a	yes
CIP395192.1	LTVR	Uncallable	A:G	C:C	G:A	AACG:-	G:A	C:C	Uncallable	G:G	Uncallable	A:C	C:C	G:T	C:C	Uncallable	Uncallable	Extreme Resistance	a	yes
CIP395193.6	LTVR	Uncallable	Uncallable	C:C	G:A	AACG:-	G:A	C:C	Uncallable	G:G	Uncallable	A:C	C:C	G:T	C:C	Uncallable	Uncallable	Extreme Resistance	a	yes
CIP395195.7	LTVR	Uncallable	A:G	C:C	G:A	AACG:-	G:A	C:C	Uncallable	G:G	Uncallable	A:C	C:C	G:T	C:C	Uncallable	Uncallable	Extreme Resistance	a	yes
CIP395196.4	LTVR	Uncallable	A:G	C:C	G:A	AACG:-	G:A	C:C	Uncallable	G:G	Uncallable	A:C	C:C	G:T	C:C	Uncallable	Uncallable	Extreme Resistance	h	yes
CIP395432.51	LTVR	Uncallable	A:G	C:C	G:A	AACG:-	G:A	C:C	Uncallable	G:G	Uncallable	A:C	C:C	G:T	C:C	Uncallable	Uncallable	Extreme Resistance	e	yes
CIP395436.8	LTVR	Uncallable	A:G	T:C	G:A	AACG:-	G:A	C:C	Uncallable	G:G	Uncallable	A:C	C:C	G:T	C:C	Uncallable	Uncallable	Extreme Resistance	e	yes
CIP395438.1	BW	Uncallable	A:G	C:C	G:A	AACG:-	G:A	C:C	Uncallable	G:G	Uncallable	A:C	C:C	G:T	C:C	Uncallable	Uncallable	Extreme Resistance	e	yes
CIP396311.1	LTVR	Uncallable	A:G	C:C	G:A	AACG:-	G:A	C:C	Uncallable	G:G	Uncallable	A:C	C:C	G:T	C:C	Uncallable	Uncallable	Extreme Resistance	a	yes
CIP397006.18	LTVR	Uncallable	G:G	C:C	G:A	AACG:-	A:A	C:C	Uncallable	G:G	Uncallable	C:C	C:C	T:T	C:C	Uncallable	Uncallable	Resistant	a	yes
CIP397012.22	LTVR	Uncallable	G:G	C:C	G:A	-:-	A:A	C:C	Uncallable	G:G	Uncallable	C:C	C:C	T:T	C:C	Uncallable	Uncallable	Extreme Resistance	f	yes
CIP397016.7	LTVR	Uncallable	A:G	C:C	G:A	AACG:-	G:A	C:C	Uncallable	G:G	Uncallable	A:C	C:C	G:T	C:C	Uncallable	Uncallable	Resistant	a	yes
CIP397029.21	LTVR	Uncallable	A:G	C:C	G:A	AACG:-	G:A	C:C	Uncallable	G:G	Uncallable	A:C	C:C	G:T	C:C	Uncallable	Uncallable	Extreme Resistance	c	yes
CIP397039.51	LTVR	Uncallable	G:G	C:C	G:A	-:-	A:A	C:C	Uncallable	G:G	Uncallable	C:C	C:C	T:T	C:C	Uncallable	Uncallable	Extreme Resistance	f	yes
CIP397039.53	LTVR	Uncallable	A:G	C:C	G:A	AACG:-	G:A	C:C	Uncallable	G:G	Uncallable	A:C	C:C	G:T	C:C	Uncallable	Uncallable	Extreme Resistance	a	yes
CIP397055.2	LTVR	Uncallable	?	?	G:A	?	A:A	C:C	Uncallable	G:G	Uncallable	C:C	C:C	T:T	C:C	Uncallable	Uncallable	Extreme Resistance	unkown	yes
CIP397065.2	LTVR	Uncallable	A:G	T:C	G:A	AACG:-	G:A	C:C	Uncallable	G:G	Uncallable	A:C	C:C	G:T	C:C	Uncallable	Uncallable	Resistant	c	yes
CIP397065.28	LTVR	Uncallable	A:G	T:C	G:A	AACG:-	G:A	C:C	Uncallable	G:G	Uncallable	A:C	C:C	G:T	C:C	Uncallable	Uncallable	Extreme Resistance	c	yes
CIP397069.5	LTVR	Uncallable	A:G	T:C	G:A	AACG:-	G:A	C:C	Uncallable	G:G	Uncallable	A:C	C:C	G:T	C:C	Uncallable	Uncallable	Extreme Resistance	c	yes
CIP397073.7	LTVR	Uncallable	A:G	T:C	G:A	AACG:-	G:A	C:C	Uncallable	G:G	Uncallable	A:C	C:C	G:T	C:C	Uncallable	Uncallable	Extreme Resistance	c	yes
CIP397078.12	LTVR	Uncallable	G:G	C:C	G:A	AACG:-	A:A	C:C	Uncallable	G:G	Uncallable	C:C	C:C	T:T	C:C	Uncallable	Uncallable	Extreme resistance	a	yes
CIP397099.4	LTVR	Uncallable	G:G	C:C	G:A	-:-	A:A	C:C	Uncallable	G:G	Uncallable	C:C	C:C	T:T	C:C	Uncallable	Uncallable	Extreme Resistance	unkown	yes
CIP397100.9	LTVR	Uncallable	A:G	C:C	G:A	AACG:-	G:A	C:C	Uncallable	G:G	Uncallable	A:C	C:C	G:T	C:C	Uncallable	Uncallable	Extreme Resistance	a	yes
CIP397196.3	LTVR	Uncallable	A:G	T:C	G:A	AACG:-	G:A	C:C	Uncallable	G:G	Uncallable	A:C	C:C	G:T	C:C	Uncallable	Uncallable	Extreme Resistance	e	yes
CIP397196.8	LTVR	Uncallable	A:G	T:C	G:A	AACG:-	G:A	C:C	Uncallable	G:G	Uncallable	A:C	C:C	G:T	C:C	Uncallable	Uncallable	Extreme Resistance	c	yes
CIP397197.9	LTVR	Uncallable	A:G	T:C	G:A	AACG:-	G:A	C:C	Uncallable	G:G	Uncallable	A:C	C:C	G:T	C:C	Uncallable	Uncallable	Extreme Resistance	c	yes
CIP700313	na	Uncallable	G:G	C:C	G:A	-:-	A:A	A:A	Uncallable	A:A	Uncallable	C:C	C:C	T:T	T:T	Uncallable	Uncallable	na	na	na
CIP701633	na	Uncallable	?	?	G:A	AACG:AACG	G:A	A:A	Uncallable	A:A	Uncallable	C:C	C:C	T:T	T:T	Uncallable	Uncallable	na	na	na
CIP701676	na	?	?	?	G:A	?	?	A:A	Uncallable	A:A	Uncallable	C:C	C:C	T:T	T:T	Uncallable	Uncallable	na	na	na
CIP702290	na	?	?	?	G:A	?	?	A:A	Uncallable	A:A	Uncallable	C:C	C:C	T:T	T:T	Uncallable	Uncallable	na	na	na
CIP702547	na	?	?	?	G:A	?	?	A:A	Uncallable	A:A	Uncallable	C:C	C:C	T:T	T:T	Uncallable	Uncallable	na	na	na
CIP703317	na	Uncallable	G:G	C:C	G:A	AACG:AACG	A:A	A:A	Uncallable	A:A	Uncallable	C:C	C:C	T:T	T:T	Uncallable	Uncallable	na	na	na
CIP703541	na	Uncallable	?	C:C	G:A	?	A:A	A:A	Uncallable	A:A	Uncallable	C:C	C:C	T:T	T:T	Uncallable	Uncallable	na	na	na
CIP703567	na	?	?	?	G:A	?	?	A:A	Uncallable	A:A	Uncallable	C:C	C:C	T:T	T:T	Uncallable	Uncallable	na	na	na
CIP703654	na	?	?	C:C	G:A	?	?	A:A	Uncallable	A:A	Uncallable	C:C	C:C	T:T	T:T	Uncallable	Uncallable	na	na	na
CIP705499	na	?	?	C:C	G:A	?	?	A:A	Uncallable	A:A	Uncallable	C:C	C:C	T:T	T:T	Uncallable	Uncallable	na	na	na
CIP300072.1	LTVR	Uncallable	A:G	T:C	G:G	AACG:-	G:A	A:A	Uncallable	A:A	Uncallable	A:C	C:C	?	?	Uncallable	Uncallable	Susceptible	g	no
CIP300093.14	LTVR	Uncallable	A:G	T:C	G:G	AACG:-	G:A	A:A	Uncallable	A:A	Uncallable	A:C	C:C	G:T	T:T	Uncallable	Uncallable	Resistant	d	no
CIP380011.12	A	Uncallable	A:G	C:C	G:G	AACG:-	G:A	A:A	Uncallable	A:A	Uncallable	A:C	C:C	?	T:T	Uncallable	Uncallable	Resistant	d	no
CIP385561.124	LTVR	Uncallable	A:G	C:C	G:G	AACG:AACG	G:A	A:A	Uncallable	A:A	Uncallable	A:C	C:C	?	T:T	Uncallable	Uncallable	Hypersensitive	b	no
CIP391004.18	B3	Uncallable	A:G	C:C	G:G	AACG:AACG	A:A	A:A	Uncallable	A:A	Uncallable	A:C	C:C	?	T:T	Uncallable	Uncallable	Highly Susceptible	d	no
CIP391065.69	B3	Uncallable	G:G	C:C	G:G	AACG:-	A:A	A:A	Uncallable	A:A	Uncallable	C:C	C:C	?	?	Uncallable	Uncallable	Susceptible	b	no
CIP391533.1	LTVR	Uncallable	A:G	C:C	G:G	AACG:-	G:A	A:A	Uncallable	A:A	Uncallable	A:C	C:C	?	T:T	Uncallable	Uncallable	Extreme Resistance	d	no
CIP391583.25	B3	Uncallable	G:G	C:C	G:G	AACG:-	A:A	A:A	Uncallable	A:A	Uncallable	C:C	C:C	?	T:T	Uncallable	Uncallable	Highly Susceptible	b	no
CIP391930.1	BW	Uncallable	A:G	C:C	G:G	AACG:AACG	G:A	A:A	Uncallable	A:A	Uncallable	A:C	C:C	?	T:T	Uncallable	Uncallable	Susceptible	d	no
CIP392032.2	LTVR	Uncallable	A:G	C:C	G:G	AACG:AACG	G:A	A:A	Uncallable	A:A	Uncallable	A:C	C:C	?	T:T	Uncallable	Uncallable	Susceptible	i	no
CIP392617.54	B3	Uncallable	A:G	C:C	G:G	AACG:-	G:A	A:A	Uncallable	A:A	Uncallable	A:C	C:C	G:T	T:T	Uncallable	Uncallable	Susceptible	unkown	no
CIP392637.27	B3	?	A:G	?	G:G	AACG:-	A:A	A:A	Uncallable	A:A	Uncallable	A:C	C:C	G:T	T:T	Uncallable	Uncallable	Highly Susceptible	b	no
CIP392657.171	B3	Uncallable	G:G	C:C	G:G	AACG:-	A:A	A:A	Uncallable	A:A	Uncallable	C:C	C:C	T:T	T:T	Uncallable	Uncallable	Highly Susceptible	negative
CIP392821.1	LTVR	Uncallable	A:G	C:C	G:G	AACG:AACG	G:A	A:A	Uncallable	A:A	Uncallable	A:C	C:C	G:T	T:T	Uncallable	Uncallable	Susceptible	b	no
CIP392973.48	LTVR	Uncallable	A:G	C:C	G:G	AACG:-	G:A	A:A	Uncallable	A:A	Uncallable	A:C	C:C	?	T:T	Uncallable	Uncallable	Susceptible	b	no
CIP393371.164	B3	Uncallable	A:G	C:C	G:G	AACG:-	G:A	A:A	Uncallable	A:A	Uncallable	A:C	C:C	G:T	T:T	Uncallable	Uncallable	Susceptible	b	no
CIP393536.13	LTVR	Uncallable	A:G	T:C	G:G	AACG:AACG	G:A	A:A	Uncallable	A:A	Uncallable	A:C	?	G:G	?	Uncallable	Uncallable	Resistant	unkown	no
CIP394034.65	LTVR	Uncallable	A:G	T:C	G:G	AACG:AACG	G:A	A:A	Uncallable	A:A	Uncallable	A:C	C:C	G:T	T:T	Uncallable	Uncallable	Highly susceptible	g	no
CIP394611.112	LTVR	Uncallable	A:A	Uncallable	G:G	AACG:AACG	G:G	A:A	Uncallable	A:A	Uncallable	A:A	T:T	G:G	T:T	Uncallable	?	Extreme Resistance	unkown	no
CIP394881.8	LTVR	Uncallable	A:G	C:C	G:G	AACG:AACG	A:A	A:A	Uncallable	A:A	Uncallable	A:C	C:C	?	?	Uncallable	Uncallable	Extreme Resistance	d	no
CIP395186.6	LTVR	Uncallable	A:G	C:C	G:G	AACG:-	G:A	A:A	Uncallable	A:A	Uncallable	A:C	C:C	G:T	T:T	Uncallable	Uncallable	Susceptible	b	no
CIP395448.1	BW	Uncallable	A:G	C:C	G:G	AACG:-	G:A	A:A	Uncallable	A:A	Uncallable	A:C	C:C	?	T:T	Uncallable	Uncallable	Extreme Resistance	d	no
CIP397014.2	LTVR	Uncallable	A:G	C:C	G:G	AACG:-	G:A	A:A	Uncallable	A:A	Uncallable	A:C	C:C	G:T	T:T	Uncallable	Uncallable	Resistant	b	no
CIP397073.15	LTVR	Uncallable	G:G	C:C	G:G	AACG:-	A:A	A:A	Uncallable	A:A	Uncallable	C:C	C:C	T:T	T:T	Uncallable	Uncallable	Highly susceptible	b	no
CIP397073.16	LTVR	Uncallable	A:G	T:C	G:G	AACG:-	G:A	A:A	Uncallable	A:A	Uncallable	A:C	C:C	G:T	T:T	Uncallable	Uncallable	Susceptible	d	no
CIP399101.1	LTVR	Uncallable	A:G	C:C	G:G	AACG:AACG	G:A	A:A	Uncallable	A:A	Uncallable	A:C	C:C	G:G	T:T	Uncallable	Uncallable	Extreme Resistance	b	no
CIP701882	na	Uncallable	G:G	C:C	G:G	?	A:A	A:A	Uncallable	A:A	Uncallable	C:C	C:C	T:T	T:T	Uncallable	Uncallable	na	na	na
CIP702286	na	Uncallable	G:G	C:C	G:G	AACG:AACG	A:A	A:A	Uncallable	A:A	Uncallable	C:C	C:C	T:T	T:T	Uncallable	Uncallable	na	na	na
CIP702450	na	Uncallable	G:G	C:C	G:G	AACG:AACG	A:A	A:A	Uncallable	A:A	Uncallable	C:C	C:C	T:T	T:T	Uncallable	Uncallable	na	na	na
CIP702467	na	Uncallable	G:G	C:C	G:G	-:-	A:A	A:A	Uncallable	A:A	Uncallable	C:C	C:C	T:T	T:T	Uncallable	Uncallable	na	na	na
CIP704068	na	Uncallable	G:G	C:C	G:G	AACG:AACG	A:A	A:A	Uncallable	A:A	Uncallable	C:C	C:C	T:T	T:T	Uncallable	Uncallable	na	na	na
CIP704797	na	Uncallable	G:G	C:C	G:G	AACG:AACG	A:A	A:A	Uncallable	A:A	Uncallable	C:C	C:C	T:T	T:T	Uncallable	Uncallable	na	na	na

## Sheet: S9
DNA \ Assay			snpST0010	GBS	snpST0012	GBS	snpST0013	GBS	snpST0014	GBS	snpST0015	GBS	snpST0016	GBS	snpST0017	GBS	snpST0018	GBS	snpST0019	GBS	snpST0020	GBS		snpST0010	GBS	snpST0012	GBS	snpST0013	GBS	snpST0014	GBS	snpST0015	GBS	snpST0016	GBS	snpST0017	GBS	snpST0018	GBS	snpST0019	GBS	snpST0020	GBS
Clone	population	phenotype	S9_58779951	S9_58779951	S9_59226671	S9_59226671	S9_59301204	S9_59301204	S9_59997331	S9_59997331	S9_60067335	S9_60067335	S9_60225630	S9_60225630	S9_60510506	S9_60510506	S9_61095507	S9_61095507	S9_61205320	S9_61205320	S9_61261167	S9_61261167		S9_58779951	S9_58779951	S9_59226671	S9_59226671	S9_59301204	S9_59301204	S9_59997331	S9_59997331	S9_60067335	S9_60067335	S9_60225630	S9_60225630	S9_60510506	S9_60510506	S9_61095507	S9_61095507	S9_61205320	S9_61205320	S9_61261167	S9_61261167
CIP388615.22	LTVR	MR	G:G	G:G	Uncallable	-:T	A:G	A:G	C:C	C:T	A:A	A:A	?	C:C	A:A	A:A	A:A	A:A	Uncallable	T:T	A:A	A:A		1		0		1		0		1		0		1		1		0		1
CIP391004.18	LB	HR	A:G	A:G	Uncallable	-:T	A:G	A:G	T:T	T:T	A:A	A:A	?	C:C	A:A	A:A	A:A	A:A	Uncallable	T:T	A:A	A:A		1		0		1		1		1		0		1		1		0		1
CIP391930.1	BW	MS	G:G	G:G	Uncallable	T:T	G:G	G:G	T:T	T:T	A:A	A:A	?	C:C	A:A	A:A	A:A	A:A	Uncallable	T:T	A:A	A:A		1		0		1		1		1		0		1		1		0		1
CIP394034.65	LTVR	R	G:G	G:G	Uncallable	T:T	G:G	G:G	T:T	T:T	A:A	A:A	?	C:C	A:A	A:A	A:A	A:A	Uncallable	T:T	A:A	A:A		1		0		1		1		1		0		1		1		0		1
CIP394613.32	LTVR	S	G:G	G:G	Uncallable	T:T	G:G	G:G	T:T	T:T	A:A	A:A	?	C:C	A:A	A:A	A:A	A:A	Uncallable	T:T	A:A	A:A		1		0		1		1		1		0		1		1		0		1
CIP395432.51	LTVR	S	G:G	G:G	Uncallable	T:T	G:G	G:G	T:T	T:T	A:A	A:A	?	C:C	A:A	A:A	A:A	A:A	Uncallable	T:T	A:A	A:A		1		0		1		1		1		0		1		1		0		1
CIP397100.9	LTVR	S	G:G	G:G	Uncallable	T:T	G:G	G:G	T:T	T:T	A:A	A:A	?	C:C	A:A	A:A	A:A	A:A	Uncallable	-:T	A:A	A:A		1		0		1		1		1		0		1		1		0		1
CIP397196.8	LTVR	S	G:G	G:G	Uncallable	T:T	G:G	G:G	T:T	T:T	A:A	A:A	?	C:C	A:A	A:A	A:A	A:A	Uncallable	T:T	A:A	A:A		1		0		1		1		1		0		1		1		0		1
CIP397055.2	LTVR	S	G:G	G:G	Uncallable	T:T	G:G	G:G	T:T	T:T	?	A:A	C:C	C:C	A:A	A:A	A:A	A:A	Uncallable	T:T	A:A	A:A		1		0		1		1		0		1		1		1		0		1
CIP397039.51	LTVR	MS	G:G	G:G	Uncallable	-:T	A:G	A:G	C:T	C:T	A:A	A:A	C:C	C:C	A:A	A:A	A:A	A:A	Uncallable	T:T	A:A	A:A		1		0		1		1		1		1		1		1		0		1
CIP397039.53	LTVR	MR	G:G	G:G	Uncallable	T:T	A:G	A:G	C:T	C:T	A:A	A:A	C:C	C:C	A:A	A:A	A:A	A:A	Uncallable	T:T	A:A	A:A		1		0		1		1		1		1		1		1		0		1
CIP380011.12	LB	R	G:G	G:G	Uncallable	T:T	G:G	G:G	C:T	C:T	A:A	A:A	C:C	T:C	A:A	A:A	A:A	A:A	Uncallable	T:T	A:A	A:A		1		0		1		1		1		0		1		1		0		1
CIP395196.4	LTVR	MR	G:G	G:G	Uncallable	-:T	G:G	G:G	C:T	C:T	A:A	A:A	C:C	C:C	A:A	G:A	A:A	A:A	Uncallable	T:T	A:A	A:A		1		0		1		1		1		1		0		1		0		1
CIP392739.4	LTVR	MS	A:G	A:G	Uncallable	-:T	A:G	A:G	T:T	T:T	A:A	A:A	C:C	C:C	A:A	A:A	A:A	A:A	Uncallable	T:T	A:A	A:A		1		0		1		1		1		1		1		1		0		1
CIP397014.2	LTVR	R	A:G	A:G	Uncallable	-:T	A:G	G:G	T:T	T:T	A:A	A:A	C:C	C:C	A:A	A:A	A:A	A:A	Uncallable	T:T	A:A	A:A		1		0		0		1		1		1		1		1		0		1
CIP394600.52	LTVR	MR	?	G:G	Uncallable	T:T	G:G	G:G	T:T	T:T	A:A	A:A	C:C	C:C	A:A	A:A	A:A	A:A	Uncallable	T:T	A:A	A:A		0		0		1		1		1		1		1		1		0		1
CIP379706.27	LTVR	S	G:G	G:G	Uncallable	T:T	G:G	G:G	T:T	T:T	A:A	A:A	C:C	C:C	A:A	A:A	A:A	A:A	Uncallable	T:T	A:A	A:A		1		0		1		1		1		1		1		1		0		1
CIP389468.3	LTVR	S	G:G	G:G	Uncallable	T:T	G:G	G:G	T:T	T:T	A:A	A:A	C:C	C:C	A:A	A:A	A:A	A:A	Uncallable	T:T	A:A	A:A		1		0		1		1		1		1		1		1		0		1
CIP390478.9	LTVR	S	G:G	G:G	Uncallable	T:T	G:G	G:G	T:T	T:T	A:A	A:A	C:C	C:C	A:A	A:A	A:A	A:A	Uncallable	T:T	A:A	A:A		1		0		1		1		1		1		1		1		0		1
CIP390637.1	LTVR	S	G:G	G:G	Uncallable	T:T	G:G	G:G	T:T	T:T	A:A	A:A	C:C	C:C	A:A	A:A	A:A	A:A	Uncallable	T:T	A:A	A:A		1		0		1		1		1		1		1		1		0		1
CIP391180.6	LTVR	MS	G:G	G:G	Uncallable	T:T	G:G	G:G	T:T	T:T	A:A	A:A	C:C	C:C	A:A	A:A	A:A	A:A	Uncallable	T:T	A:A	A:A		1		0		1		1		1		1		1		1		0		1
CIP391207.2	LTVR	S	G:G	G:G	Uncallable	T:T	G:G	G:G	T:T	T:T	A:A	A:A	C:C	C:C	A:A	A:A	A:A	A:A	Uncallable	T:T	A:A	A:A		1		0		1		1		1		1		1		1		0		1
CIP391382.18	LTVR	S	G:G	G:G	Uncallable	T:T	G:G	G:G	T:T	T:T	A:A	A:A	C:C	C:C	A:A	A:A	A:A	A:A	Uncallable	T:T	A:A	A:A		1		0		1		1		1		1		1		1		0		1
CIP391533.1	LTVR	HR	G:G	A:G	Uncallable	-:T	G:G	A:G	T:T	C:T	A:A	G:A	C:C	T:C	A:A	G:A	A:A	T:A	Uncallable	-:T	A:A	C:A		0		0		0		0		0		0		0		0		0		0
CIP392025.7	LTVR	MR	G:G	G:G	Uncallable	T:T	G:G	G:G	T:T	T:T	A:A	A:A	C:C	C:C	A:A	A:A	A:A	A:A	Uncallable	T:T	A:A	A:A		1		0		1		1		1		1		1		1		0		1
CIP392032.2	LTVR	S	G:G	G:G	Uncallable	T:T	G:G	G:G	T:T	T:T	A:A	A:A	C:C	C:C	A:A	A:A	A:A	A:A	Uncallable	T:T	A:A	A:A		1		0		1		1		1		1		1		1		0		1
CIP392740.4	LTVR	S	G:G	G:G	Uncallable	T:T	G:G	G:G	T:T	T:T	A:A	A:A	C:C	C:C	A:A	A:A	A:A	A:A	Uncallable	T:T	A:A	A:A		1		0		1		1		1		1		1		1		0		1
CIP392759.1	LTVR	MS	G:G	G:G	Uncallable	T:T	G:G	G:G	T:T	T:T	A:A	A:A	C:C	C:C	A:A	A:A	A:A	A:A	Uncallable	T:T	A:A	A:A		1		0		1		1		1		1		1		1		0		1
CIP392780.1	LTVR	S	G:G	G:G	Uncallable	T:T	G:G	G:G	T:T	T:T	A:A	A:A	C:C	C:C	A:A	0:0	A:A	A:A	Uncallable	T:T	A:A	A:A		1		0		1		1		1		1		0		1		0		1
CIP392820.1	LTVR	S	G:G	G:G	Uncallable	T:T	G:G	G:G	T:T	T:T	A:A	A:A	C:C	C:C	A:A	A:A	A:A	A:A	Uncallable	T:T	A:A	A:A		1		0		1		1		1		1		1		1		0		1
CIP392973.48	LTVR	S	G:G	G:G	Uncallable	T:T	G:G	G:G	T:T	T:T	A:A	A:A	C:C	C:C	A:A	A:A	A:A	A:A	Uncallable	T:T	A:A	A:A		1		0		1		1		1		1		1		1		0		1
CIP393536.13	LTVR	S	G:G	G:G	Uncallable	T:T	G:G	G:G	T:T	T:T	A:A	A:A	C:C	C:C	A:A	A:A	A:A	A:A	Uncallable	T:T	A:A	A:A		1		0		1		1		1		1		1		1		0		1
CIP393613.2	LTVR	S	G:G	G:G	Uncallable	T:T	G:G	G:G	T:T	T:T	A:A	A:A	C:C	C:C	A:A	0:0	A:A	A:A	Uncallable	T:T	A:A	A:A		1		0		1		1		1		1		0		1		0		1
CIP393615.6	LTVR	S	G:G	G:G	Uncallable	T:T	G:G	G:G	T:T	T:T	A:A	A:A	C:C	C:C	A:A	A:A	A:A	A:A	Uncallable	T:T	A:A	A:A		1		0		1		1		1		1		1		1		0		1
CIP393708.31	LTVR	MR	G:G	G:G	Uncallable	T:T	G:G	G:G	T:T	T:T	A:A	A:A	C:C	C:C	A:A	A:A	A:A	A:A	Uncallable	T:T	A:A	A:A		1		0		1		1		1		1		1		1		0		1
CIP394034.7	LTVR	R	G:G	G:G	Uncallable	T:T	G:G	G:G	T:T	T:T	A:A	A:A	C:C	C:C	A:A	A:A	A:A	A:A	Uncallable	T:T	A:A	A:A		1		0		1		1		1		1		1		1		0		1
CIP394611.112	LTVR	Rpi gene?	G:G	G:G	Uncallable	T:T	G:G	G:G	T:T	T:T	A:A	A:A	C:C	C:C	A:A	A:A	A:A	A:A	Uncallable	T:T	A:A	A:A		1		0		1		1		1		1		1		1		0		1
CIP394613.139	LTVR	MR	G:G	G:G	Uncallable	T:T	G:G	G:G	T:T	T:T	A:A	A:A	C:C	C:C	A:A	A:A	A:A	A:A	Uncallable	T:T	A:A	A:A		1		0		1		1		1		1		1		1		0		1
CIP394614.117	LTVR	MS	G:G	G:G	Uncallable	T:T	G:G	G:G	T:T	T:T	A:A	A:A	C:C	C:C	A:A	A:A	A:A	A:A	Uncallable	T:T	A:A	A:A		1		0		1		1		1		1		1		1		0		1
CIP394881.8	LTVR	S	G:G	G:G	Uncallable	T:T	G:G	G:G	T:T	T:T	A:A	A:A	C:C	C:C	A:A	A:A	A:A	A:A	Uncallable	T:T	A:A	A:A		1		0		1		1		1		1		1		1		0		1
CIP395186.6	LTVR	S	G:G	G:G	Uncallable	T:T	G:G	G:G	T:T	T:T	A:A	A:A	C:C	C:C	A:A	A:A	A:A	A:A	Uncallable	T:T	A:A	A:A		1		0		1		1		1		1		1		1		0		1
CIP395192.1	LTVR	S	G:G	G:G	Uncallable	T:T	G:G	G:G	T:T	T:T	A:A	A:A	C:C	C:C	A:A	A:A	A:A	A:A	Uncallable	T:T	A:A	A:A		1		0		1		1		1		1		1		1		0		1
CIP395193.6	LTVR	S	G:G	G:G	Uncallable	T:T	G:G	G:G	T:T	T:T	A:A	A:A	C:C	C:C	A:A	A:A	A:A	A:A	Uncallable	T:T	A:A	A:A		1		0		1		1		1		1		1		1		0		1
CIP395195.7	LTVR	MS	G:G	G:G	Uncallable	T:T	G:G	G:G	T:T	T:T	A:A	A:A	C:C	C:C	A:A	A:A	A:A	A:A	Uncallable	T:T	A:A	A:A		1		0		1		1		1		1		1		1		0		1
CIP395436.8	LTVR	MR	G:G	G:G	Uncallable	T:T	G:G	G:G	T:T	T:T	A:A	A:A	C:C	C:C	A:A	A:A	A:A	A:A	Uncallable	T:T	A:A	A:A		1		0		1		1		1		1		1		1		0		1
CIP395438.1	BW	S	G:G	G:G	Uncallable	T:T	G:G	G:G	T:T	T:T	A:A	A:A	C:C	C:C	A:A	A:A	A:A	A:A	Uncallable	T:T	A:A	A:A		1		0		1		1		1		1		1		1		0		1
CIP395448.1	BW	MR	G:G	G:G	Uncallable	T:T	G:G	G:G	T:T	T:T	A:A	A:A	C:C	0:0	A:A	A:A	A:A	A:A	Uncallable	T:T	A:A	A:A		1		0		1		1		1		0		1		1		0		1
CIP396311.1	LTVR	S	G:G	G:G	Uncallable	T:T	G:G	G:G	T:T	T:T	A:A	A:A	C:C	C:C	A:A	A:A	A:A	A:A	Uncallable	T:T	A:A	A:A		1		0		1		1		1		1		1		1		0		1
CIP397006.18	LTVR	S	G:G	G:G	Uncallable	T:T	G:G	G:G	T:T	T:T	A:A	A:A	C:C	C:C	A:A	A:A	A:A	A:A	Uncallable	T:T	A:A	A:A		1		0		1		1		1		1		1		1		0		1
CIP397012.22	LTVR	MS	G:G	G:G	Uncallable	T:T	G:G	G:G	T:T	T:T	A:A	A:A	C:C	C:C	A:A	A:A	A:A	A:A	Uncallable	T:T	A:A	A:A		1		0		1		1		1		1		1		1		0		1
CIP397016.7	LTVR	HS	G:G	G:G	Uncallable	T:T	G:G	G:G	T:T	T:T	A:A	A:A	C:C	C:C	A:A	A:A	A:A	A:A	Uncallable	T:T	A:A	A:A		1		0		1		1		1		1		1		1		0		1
CIP397029.21	LTVR	MR	G:G	G:G	Uncallable	T:T	G:G	G:G	T:T	T:T	A:A	A:A	C:C	C:C	A:A	A:A	A:A	A:A	Uncallable	T:T	A:A	A:A		1		0		1		1		1		1		1		1		0		1
CIP397065.2	LTVR	S	G:G	G:G	Uncallable	T:T	G:G	G:G	T:T	T:T	A:A	A:A	C:C	C:C	A:A	A:A	A:A	A:A	Uncallable	T:T	A:A	A:A		1		0		1		1		1		1		1		1		0		1
CIP397065.28	LTVR	S	G:G	G:G	Uncallable	T:T	G:G	G:G	T:T	T:T	A:A	A:A	C:C	C:C	A:A	A:A	A:A	A:A	Uncallable	T:T	A:A	A:A		1		0		1		1		1		1		1		1		0		1
CIP397069.5	LTVR	S	G:G	G:G	Uncallable	T:T	G:G	G:G	T:T	T:T	A:A	A:A	C:C	C:C	A:A	A:A	A:A	A:A	Uncallable	T:T	A:A	A:A		1		0		1		1		1		1		1		1		0		1
CIP397073.15	LTVR	MR	G:G	G:G	Uncallable	T:T	G:G	G:G	T:T	T:T	A:A	A:A	C:C	C:C	A:A	A:A	A:A	A:A	Uncallable	T:T	A:A	A:A		1		0		1		1		1		1		1		1		0		1
CIP397073.16	LTVR	S	G:G	G:G	Uncallable	T:T	G:G	G:G	T:T	T:T	A:A	A:A	C:C	C:C	A:A	A:A	A:A	A:A	Uncallable	T:T	A:A	A:A		1		0		1		1		1		1		1		1		0		1
CIP397073.7	LTVR	S	G:G	G:G	Uncallable	T:T	G:G	G:G	T:T	T:T	A:A	A:A	C:C	C:C	A:A	0:0	A:A	A:A	Uncallable	T:T	A:A	A:A		1		0		1		1		1		1		0		1		0		1
CIP397078.12	LTVR	R	G:G	G:G	Uncallable	T:T	G:G	G:G	T:T	T:T	A:A	A:A	C:C	C:C	A:A	A:A	A:A	A:A	Uncallable	T:T	A:A	A:A		1		0		1		1		1		1		1		1		0		1
CIP397099.4	LTVR	MS	G:G	G:G	Uncallable	T:T	G:G	G:G	T:T	T:T	A:A	A:A	C:C	C:C	A:A	A:A	A:A	A:A	Uncallable	T:T	A:A	A:A		1		0		1		1		1		1		1		1		0		1
CIP397196.3	LTVR	MS	G:G	G:G	Uncallable	T:T	G:G	G:G	T:T	T:T	A:A	A:A	C:C	C:C	A:A	A:A	A:A	A:A	Uncallable	T:T	A:A	A:A		1		0		1		1		1		1		1		1		0		1
CIP397197.9	LTVR	S	G:G	G:G	Uncallable	T:T	G:G	G:G	T:T	T:T	A:A	A:A	C:C	C:C	A:A	A:A	A:A	A:A	Uncallable	T:T	A:A	A:A		1		0		1		1		1		1		1		1		0		1
CIP399101.1	LTVR	MS	G:G	G:G	Uncallable	T:T	G:G	G:G	T:T	T:T	A:A	A:A	C:C	C:C	A:A	A:A	A:A	A:A	Uncallable	T:T	A:A	A:A		1		0		1		1		1		1		1		1		0		1
CIP388611.22	LTVR	S	G:G	G:G	Uncallable	T:T	G:G	G:G	T:T	T:T	A:A	A:A	Uncallable	C:C	A:A	A:A	A:A	A:A	Uncallable	T:T	A:A	A:A		1		0		1		1		1		0		1		1		0		1
CIP392617.54	LB	Rpi gene?	A:A	A:G	Uncallable	-:T	A:A	A:G	C:T	C:T	G:A	G:A	C:C	T:C	G:A	G:A	T:A	T:A	Uncallable	T:T	C:A	C:A		0		0		0		1		1		0		1		1		0		1
CIP392657.171	LB	Rpi gene?	A:A	A:G	Uncallable	-:T	A:G	A:G	C:T	C:T	G:A	G:A	C:C	T:C	G:A	G:A	T:A	A:A	Uncallable	-:T	C:A	C:A		0		0		1		1		1		0		1		0		0		1
CIP392821.1	LTVR	HR	A:G	A:G	Uncallable	-:T	A:G	A:G	C:T	C:T	G:A	G:A	C:C	T:C	G:A	G:A	T:A	T:A	Uncallable	-:T	C:A	C:A		1		0		1		1		1		0		1		1		0		1
CIP393371.164	LB	Rpi gene?	A:G	A:G	Uncallable	-:T	A:G	A:G	C:T	C:T	G:A	G:A	C:C	T:C	G:A	G:A	T:A	0:0	Uncallable	-:T	C:A	C:A		1		0		1		1		1		0		1		0		0		1
CIP393617.1	LTVR	HR	A:G	A:G	Uncallable	-:T	A:G	G:G	C:T	T:T	G:A	G:A	C:C	T:C	G:A	G:A	T:A	T:A	Uncallable	-:T	C:A	C:A		1		0		0		0		1		0		1		1		0		1
CIP391065.69	LB	Rpi gene?	G:G	G:G	Uncallable	T:T	G:G	G:G	C:T	C:T	G:A	G:A	C:C	T:C	G:A	G:A	T:A	T:A	Uncallable	-:T	C:A	C:A		1		0		1		1		1		0		1		1		0		1
CIP385561.124	RKN	R	A:G	A:G	Uncallable	-:T	A:G	A:G	C:T	C:T	G:A	G:A	C:C	T:C	G:G	G:A	T:A	T:A	Uncallable	-:T	C:A	C:A		1		0		1		1		1		0		0		1		0		1
CIP392637.27	LB	Rpi gene?	A:G	A:G	Uncallable	-:T	A:G	G:G	?	C:T	?	G:A	C:C	T:C	G:A	G:A	Uncallable	T:A	Uncallable	-:T	C:A	C:A		1		0		0		0		0		0		1		0		0		1
CIP391583.25	LB	Rpi gene?	A:A	A:G	Uncallable	-:T	A:A	A:G	C:T	C:T	G:G	G:A	C:C	T:C	G:G	G:A	T:T	T:A	Uncallable	-:T	C:C	C:C		0		0		0		1		0		0		0		0		0		1
																								68		0		67		69		69		52		66		68		0		72
																								0.931507		0		0.917808		0.945205		0.945205		0.712329		0.90411		0.931507		0		0.986301
																								snpST0010	GBS	snpST0012	GBS	snpST0013	GBS	snpST0014	GBS	snpST0015	GBS	snpST0016	GBS	snpST0017	GBS	snpST0018	GBS	snpST0019	GBS	snpST0020	GBS
																								S9_58779951	S9_58779951	S9_59226671	S9_59226671	S9_59301204	S9_59301204	S9_59997331	S9_59997331	S9_60067335	S9_60067335	S9_60225630	S9_60225630	S9_60510506	S9_60510506	S9_61095507	S9_61095507	S9_61205320	S9_61205320	S9_61261167	S9_61261167
																								0.931507		0		0.917808		0.945205		0.945205		0.712329		0.90411		0.931507		0		0.986301
																								snpST0010	GBS	snpST0012	GBS	snpST0013	GBS	snpST0014	GBS	snpST0015	GBS	snpST0016	GBS	snpST0017	GBS	snpST0018	GBS	snpST0019	GBS	snpST0020	GBS
																								S9_58779951	S9_58779951	S9_59226671	S9_59226671	S9_59301204	S9_59301204	S9_59997331	S9_59997331	S9_60067335	S9_60067335	S9_60225630	S9_60225630	S9_60510506	S9_60510506	S9_61095507	S9_61095507	S9_61205320	S9_61205320	S9_61261167	S9_61261167

## Sheet: LB pheno
			AUDPC	sAUDPC	R	AUDPC	sAUDPC	R
			ENV 1	ENV 1	ENV 1	ENV 2	ENV 2	ENV 2
Set	Clone	PT	AVG	AVG	AVG	AVG	AVG	AVG
6	CIP300046.22	LTVR	255	0.5	Rpi gene?
6	CIP300048.12	LTVR	3080	8.2	S
6	CIP300054.29	LTVR	1760	4.7	MR
6	CIP300055.32	LTVR	437	1	Rpi gene?
6	CIP300056.33	LTVR	2039	5.2	MR
6	CIP300063.4	LTVR	1828	4.8	MR
6	CIP300063.9	LTVR	1949	6.3	MS
6	CIP300065.4	LTVR	2139	5.6	MS
6	CIP300066.11	LTVR	1670	4.3	MR
6	CIP300072.1	LTVR	1961	5.2	MR
6	CIP300093.14	LTVR	3191	8.5	S
6	CIP300099.22	LTVR	211	0.5	Rpi gene?
6	CIP300101.11	LTVR	1669	4.4	MR
6	CIP300135.14	LTVR	3082	8.2	S
6	CIP300135.3	LTVR	3156	8.3	S
6	CIP300137.31	LTVR	1917	5	MR
6	CIP301023.15	Intermediate LT-LB	274	0.6	Rpi gene?
6	CIP301024.14	Intermediate LT-LB	110	0.3	Rpi gene?
6	CIP301024.95	Intermediate LT-LB	136	0.3	Rpi gene?
6	CIP301026.23	Intermediate LT-LB	2326	6	MS
6	CIP301029.18	Intermediate LT-LB	217	0.5	Rpi gene?
6	CIP301037.85	Intermediate LT-LB	866	2.3	HR
6	CIP301040.63	Intermediate LT-LB	1647	4.3	MR
6	CIP301041.26	Intermediate LT-LB	1076	2.8	R
6	CIP301044.36	Intermediate LT-LB	2358	6.3	MS
6	CIP301045.74	Intermediate LT-LB	1100	3	R
6	CIP301055.53	Intermediate LT-LB	793	2	HR
6	CIP301056.54	Intermediate LT-LB	1202	3.2	R
7	CIP302033.11	LTVR	595	2.3	HR
7	CIP302071.31	LTVR	244	0.9	Rpi gene?
7	CIP302076.33	LTVR	454	1.7	HR
7	CIP302086.17	LTVR	94	0.4	Rpi gene?
7	CIP302092.12	LTVR	144	0.5	Rpi gene?
7	CIP302134.11	LTVR	1087	4.1	MR
7	CIP302148.11	LTVR	764	2.9	R
7	CIP302148.12	LTVR	1629	6.2	MS
7	CIP302173.12	LTVR	672	2.5	HR
7	CIP302173.36	LTVR	1049	4	R
7	CIP302174.31	LTVR	3025	11.4	HS
7	CIP302235.31	LTVR	840	3.2	R
7	CIP302428.20	LTVR	3329	12.6	HS
7	CIP302476.108	LTVR	2684	10.2	HS
7	CIP302498.70	LTVR	2722	10.3	HS
7	CIP302499.30	LTVR	3016	11.4	HS
7	CIP303037.15	LTVR	3077	11.6	HS
7	CIP303037.17	LTVR	1368	5.2	MR
7	CIP303037.31	LTVR	2969	11.2	HS
7	CIP304345.102	LTVR	1719	6.5	MS
7	CIP304349.8	LTVR	2980	11.3	HS
7	CIP304350.100	LTVR	2242	8.5	S
7	CIP304350.18	LTVR	1745	6.6	S
7	CIP304350.78	LTVR	2056	7.8	S
7	CIP304350.95	LTVR	2476	9.4	HS
7	CIP304351.109	LTVR	1647	6.2	MS
7	CIP304351.31	LTVR	951	3.6	R
7	CIP304366.46	LTVR	2231	8.4	S
7	CIP304369.22	LTVR	1699	6.4	MS
7	CIP304371.20	LTVR	3183	12	HS
7	CIP304371.58	LTVR	2673	10.1	HS
7	CIP304371.67	LTVR	3003	11.4	HS
7	CIP304383.41	LTVR	3106	11.7	HS
7	CIP304383.80	LTVR	3098	11.7	HS
7	CIP304387.39	LTVR	3213	12.2	HS
7	CIP304394.56	LTVR	3011	11.4	HS
7	CIP304399.15	LTVR	3174	12	HS
7	CIP304399.5	LTVR	2921	11	HS
7	CIP304405.42	LTVR	447	1.7	HR
7	CIP304405.47	LTVR	380	1.4	HR
1	CIP370116	TPS	146	0.7	Rpi gene?	3076	6.5	MS
1	CIP370119	TPS	1331	6.5	MS	1348	2.9	R
1	CIP370120	TPS	1136	5.5	MR	3133	6.6	S
1	CIP370121	TPS	1684	8.2	S	2069	4.4	MR
1	CIP370122	TPS	281	1.4	HR	3093	6.5	MS
1	CIP370123	TPS	390	1.9	HR	1663	3.5	R
1	CIP377744.2	LB	750	3.7	R	1540	3.3	R
6	CIP379706.27	LTVR	2706	7.2	S
3	CIP380011.12	LB	1416	3.2	R	1076	3.6	R
3	CIP381381.13	LB	767	1.4	HR	510	1.7	HR
3	CIP381381.9	LB	894	1.8	HR	411	1.3	HR
1	CIP382150.16	LB	1001	4.9	MR	2739	5.8	MS
1	CIP384298.56	LB	240	1.2	HR	1054	2.2	HR
4	CIP385499.11	PreBreeding	3299	7.6	S	2155	7.2	S
1	CIP385524.9	LB	713	3.5	R	433	0.9	Rpi gene?
1	CIP385556.4	LB	1178	5.7	MS	188	0.4	Rpi gene?
5	CIP385558.2	RKN	3536	7	S	2713	8.5	S
5	CIP385558.4	RKN	2912	5.9	MS	2444	7.7	S
2	CIP385558.8	RKN	1129	5.8	MS	1601	5.2	MR
2	CIP385561.124	RKN	908	3.9	R	503	1.6	HR
1	CIP386039.17	LB	90	0.4	Rpi gene?	783	1.7	HR
1	CIP387091.37	LB	180	0.9	Rpi gene?	1081	2.3	HR
1	CIP387096.2	LB	409	2	HR	179	0.4	Rpi gene?
1	CIP387164.4	LB	244	1.2	HR	236	0.5	Rpi gene?
1	CIP387170.16	LB	124	0.6	Rpi gene?	149	0.3	Rpi gene?
1	CIP387170.9	LB	113	0.6	Rpi gene?	66	0.1	Rpi gene?
1	CIP387205.5	LB	836	4.1	MR	1470	3.1	R
1	CIP387334.5	LB	255	1.2	HR	1479	3.1	R
1	CIP388611.22	LTVR	2457	6.9	S	2975	6.3	MS
1	CIP388615.22	LTVR	2078	5.5	MR	2914	6.2	MS
6	CIP388676.1	LTVR	1611	4.3	MR
1	CIP388972.22	LTVR	2874	7.9	S	3233	6.8	S
2	CIP389447.5	LTVR	1294	6.6	S	1501	4.9	MR
4	CIP389468.3	LTVR	3344	7.7	S	2167	7.3	S
1	CIP389746.2	LB	131	0.6	Rpi gene?	1019	2.2	HR
6	CIP390478.9	LTVR	2828	7.5	S
1	CIP390637.1	LTVR	2460	6.9	S	3019	6.4	MS
2	CIP390663.8	LTVR	2294	6.7	S	1807	5.9	MS
2	CIP391002.6	LB	536	2.7	R	341	1.1	HR
5	CIP391004.18	LB	561	1	HR	425	1.3	HR
2	CIP391011.17	LB	615	3.2	R	319	1	Rpi gene?
5	CIP391046.14	LB	2668	4.9	MR	2075	6.5	MS
5	CIP391047.34	LB	335	0.6	Rpi gene?	1603	5	MR
5	CIP391058.175	LB	475	0.8	Rpi gene?	1909	6	MS
5	CIP391065.69	LB	238	0.4	Rpi gene?	1950	6.1	MS
5	CIP391065.81	LB	324	0.5	Rpi gene?	1831	5.7	MS
1	CIP391137.7	LB	251	1.2	HR	529	1.1	HR
4	CIP391180.6	LTVR	2996	6.5	MS	1869	6.2	MS
2	CIP391207.2	LTVR	2536	7.3	S	1483	4.8	MR
6	CIP391382.18	LTVR	2579	7	S
1	CIP391464.6	LMF	1354	6.6	S	3049	6.5	MS
4	CIP391533.1	LTVR	663	1.2	HR	492	1.7	HR
2	CIP391580.30	LB	780	4	R	438	1.4	HR
5	CIP391583.25	LB	346	0.6	Rpi gene?	1750	5.5	MR
5	CIP391585.167	LB	71	0.2	Rpi gene?	1716	5.4	MR
5	CIP391585.179	LB	418	0.8	Rpi gene?	1947	6.1	MS
5	CIP391585.5	LB	353	0.6	Rpi gene?	1884	5.9	MS
1	CIP391683.29	LB	1163	5.7	MS	2170	4.6	MR
1	CIP391691.96	LB	368	1.8	HR	1094	2.3	HR
4	CIP391724.1	LTVR	3936	9.7	HS	2402	8	S
2	CIP391846.5	LTVR	1433	7.3	S	1947	6.4	MS
2	CIP391904.14	RKN	135	0.7	Rpi gene?	1444	4.7	MR
5	CIP391905.10	RKN	623	1.3	HR	1794	5.6	MS
2	CIP391905.13	RKN	1016	5.2	MR	1457	4.8	MR
5	CIP391918.4	BW	3338	6.8	S	2681	8.4	S
3	CIP391919.3	BW	360	0.6	Rpi gene?	470	1.5	HR
3	CIP391930.1	BW	2855	6.4	MS	1906	6.4	MS
3	CIP391931.1	BW	3326	7.7	S	2113	7.1	S
4	CIP392025.7	LTVR	2449	5.3	MR	1093	3.6	R
4	CIP392032.2	LTVR	3115	7.1	S	2016	6.8	S
1	CIP392047.19	LB	293	1.4	HR	389	0.8	Rpi gene?
5	CIP392278.19	BW	3497	6.6	S	2197	5.9	MS
3	CIP392285.72	BW	458	0.9	Rpi gene?	632	2.1	HR
5	CIP392289.34	BW	2134	4.3	MR	2359	7.4	S
3	CIP392617.54	LB	57	0.2	Rpi gene?	160	0.5	Rpi gene?
2	CIP392633.54	LB	274	1.4	HR	897	2.9	R
2	CIP392633.64	LB	315	1.6	HR	1033	3.4	R
5	CIP392634.49	LB	210	0.4	Rpi gene?	1478	4.6	MR
5	CIP392634.52	LB	253	0.5	Rpi gene?	1534	4.8	MR
2	CIP392637.10	LB	690	3.5	R	398	1.3	HR
5	CIP392637.27	LB	235	0.5	Rpi gene?	1800	5.6	MS
5	CIP392639.34	LB	1820	3.4	R	1603	5	MR
2	CIP392640.18	LB	386	2	HR	674	2.2	HR
5	CIP392650.12	LB	65	0.2	Rpi gene?	1163	3.6	R
5	CIP392657.171	LB	432	0.8	Rpi gene?	1609	5	MR
2	CIP392657.8	LB	683	3.5	R	893	2.9	R
2	CIP392661.18	LB	874	4.5	MR	1260	4.1	MR
1	CIP392730.2	LTVR	1718	8.4	S	2109	4.5	MR
4	CIP392739.4	LTVR	2410	5.7	MS	1177	3.9	R
4	CIP392740.4	LTVR	3524	8.9	S	2412	8.1	S
4	CIP392745.7	LTVR	3039	7	S	2141	7.2	S
4	CIP392759.1	LTVR	2334	5.6	MS	1971	6.6	S
6	CIP392780.1	LTVR	2712	7.3	S
6	CIP392781.1	LTVR	287	0.7	Rpi gene?
1	CIP392797.22	LTVR	1962	5.2	MR	2901	6.1	MS
4	CIP392820.1	LTVR	3216	8	S	2307	7.7	S
4	CIP392821.1	LTVR	645	1.1	HR	570	1.9	HR
2	CIP392822.3	LTVR	2022	6.1	MS	2013	6.6	S
1	CIP392823.4	LTVR	1331	6.5	MS	2962	6.3	MS
4	CIP392824.1	LTVR	3793	9	HS	2334	7.8	S
1	CIP392826.4	LMF	1530	7.5	S	3303	7	S
6	CIP392973.48	LTVR	2539	6.7	S
3	CIP393073.179	LB	735	1.3	HR	265	0.9	Rpi gene?
3	CIP393073.197	LB	1271	2.4	HR	492	1.6	HR
5	CIP393075.54	LB	982	1.8	HR	881	2.8	R
2	CIP393077.159	LB	255	1.3	HR	1028	3.4	R
5	CIP393077.162	LB	582	1	HR	516	1.6	HR
2	CIP393077.54	LB	191	1	Rpi gene?	473	1.5	HR
5	CIP393079.24	LB	391	0.7	Rpi gene?	1050	3.3	R
1	CIP393079.4	LB	1084	5.3	MR	901	1.9	HR
3	CIP393083.2	LB	270	0.6	Rpi gene?	350	1.2	HR
5	CIP393084.31	LB	697	1.2	HR	622	1.9	HR
2	CIP393085.5	LB	368	1.9	HR	324	1.1	HR
2	CIP393220.54	LB	360	1.8	HR	236	0.8	Rpi gene?
5	CIP393227.66	LB	211	0.4	Rpi gene?	1069	3.3	R
3	CIP393228.67	LB	175	0.4	Rpi gene?	161	0.5	Rpi gene?
2	CIP393242.50	LB	435	2.2	HR	739	2.4	HR
2	CIP393248.55	LB	559	2.9	R	678	2.2	HR
2	CIP393280.57	LB	638	3.3	R	197	0.6	Rpi gene?
2	CIP393280.64	LB	853	3.2	R	735	2.4	HR
3	CIP393280.82	LB	86	0.2	Rpi gene?	221	0.8	Rpi gene?
5	CIP393280.83	LB	209	0.4	Rpi gene?	1763	5.5	MR
5	CIP393284.39	LB	501	0.8	Rpi gene?	2259	7.1	S
2	CIP393339.242	LB	439	2.3	HR	394	1.3	HR
3	CIP393349.68	LB	692	1.3	HR	274	0.9	Rpi gene?
2	CIP393371.157	LB	694	3.6	R	416	1.4	HR
2	CIP393371.159	LB	203	1	Rpi gene?	503	1.6	HR
3	CIP393371.164	LB	258	0.5	Rpi gene?	196	0.7	Rpi gene?
2	CIP393371.58	LB	45	0.2	Rpi gene?	70	0.2	Rpi gene?
3	CIP393382.44	LB	1463	3.1	R	1053	3.5	R
2	CIP393385.39	LB	769	3.9	R	350	1.1	HR
2	CIP393385.47	LB	394	2	HR	144	0.5	Rpi gene?
5	CIP393385.57	LB	1607	2.9	R	2281	7.1	S
4	CIP393536.13	LTVR	3484	8.2	S	2259	7.6	S
2	CIP393595.1	LTVR	1271	6.5	MS	1899	6.2	MS
4	CIP393612.1	LTVR	502	1	Rpi gene?	530	1.8	HR
4	CIP393613.2	LTVR	3683	8.8	S	2301	7.7	S
4	CIP393614.3	LTVR	754	1.5	HR	821	2.8	R
4	CIP393615.6	LTVR	3044	6.8	S	2303	7.7	S
4	CIP393617.1	LTVR	864	1.6	HR	818	2.8	R
1	CIP393651.5	LMF	1118	5.5	MR	2468	5.2	MR
4	CIP393708.31	LTVR	2220	5.3	MR	2017	6.7	S
6	CIP394034.65	LTVR	1053	2.9	R
2	CIP394034.7	LTVR	1110	3.6	R	879	2.9	R
2	CIP394199.2	LMF	1073	5.5	MR	923	3	R
2	CIP394223.1	LMF	881	4.5	MR	407	1.3	HR
2	CIP394223.13	LMF	761	3.9	R	687	2.2	HR
2	CIP394223.17	LMF	469	2.4	HR	363	1.2	HR
6	CIP394223.19	LMF	2347	6.3	MS
5	CIP394223.5	LMF	2187	4.4	MR	2338	7.3	S
6	CIP394223.9	LMF	2867	7.6	S
6	CIP394579.36	LTVR	2329	6.1	MS
5	CIP394600.52	LTVR	2645	5.2	MR	2634	8.3	S
4	CIP394611.112	LTVR	482	1	Rpi gene?	437	1.4	HR
4	CIP394613.139	LTVR	1718	4.1	MR	1454	4.9	MR
4	CIP394613.32	LTVR	3228	7.1	S	2184	7.4	S
4	CIP394614.117	LTVR	2467	5.6	MS	1567	5.2	MR
2	CIP394881.8	LTVR	2556	7.4	S	2161	7.1	S
3	CIP394895.7	BW	932	1.6	HR	523	1.8	HR
6	CIP394898.13	BW	48	0.1	Rpi gene?
5	CIP394899.5	BW	309	0.6	Rpi gene?	2059	6.5	MS
6	CIP394900.1	BW	1839	4.7	MR
6	CIP394901.2	BW	2816	7.6	S
3	CIP394902.4	BW	2546	6.3	MS	1819	6.1	MS
3	CIP394903.1	BW	662	1.7	HR	411	1.4	HR
3	CIP394903.3	BW	1775	3.8	R	1006	3.4	R
3	CIP394903.5	BW	2066	5.1	MR	1351	4.5	MR
5	CIP394903.6	BW	1484	3	R	1769	5.5	MR
3	CIP394904.17	BW	1826	4.2	MR	1022	3.4	R
3	CIP394904.20	BW	725	1.3	HR	400	1.4	HR
5	CIP394904.21	BW	3671	7.4	S	2731	8.6	S
3	CIP394904.9	BW	397	0.7	Rpi gene?	268	0.9	Rpi gene?
3	CIP394905.12	BW	2719	6.7	S	1832	6.2	MS
3	CIP394905.8	BW	2209	5.3	MR	1407	4.7	MR
3	CIP394906.6	BW	390	0.7	Rpi gene?	354	1.2	HR
3	CIP394907.1	BW	1443	3	R	1069	3.5	R
3	CIP394907.3	BW	2218	4.8	MR	1567	5.2	MR
3	CIP394908.13	BW	3168	8.3	S	2329	7.8	S
3	CIP394909.2	BW	3052	7.9	S	2178	7.3	S
6	CIP395186.6	LTVR	2750	7.5	S
1	CIP395192.1	LTVR	2917	7.8	S	3168	6.7	S
1	CIP395193.1	LTVR	1661	8.1	S	3181	6.7	S
1	CIP395193.4	LTVR	814	4	R	2730	5.8	MS
2	CIP395193.6	LTVR	2610	7.3	S	1698	5.5	MR
2	CIP395194.9	LTVR	1484	5.5	MR	2008	6.6	S
2	CIP395195.7	LTVR	2266	6.5	MS	1606	5.2	MR
2	CIP395196.4	LTVR	2037	5.2	MR	1549	5.1	MR
2	CIP395197.5	LTVR	2059	5.8	MS	1864	6.1	MS
3	CIP395432.51	LTVR	3126	7.1	S	2082	7	S
5	CIP395434.1	LTVR	1882	3.7	R	2434	7.6	S
5	CIP395436.8	LTVR	2612	4.8	MR	2012	5.4	MR
3	CIP395438.1	BW	3424	8	S	2194	7.4	S
3	CIP395443.103	BW	667	1.2	HR	484	1.7	HR
5	CIP395444.1	BW	3032	5.7	MS	2106	5.6	MS
3	CIP395445.16	BW	3465	9.1	HS	2363	7.9	S
3	CIP395446.1	BW	2975	7.5	S	1972	6.6	S
3	CIP395447.24	BW	1488	3	R	1282	4.3	MR
5	CIP395448.1	BW	2203	4.4	MR	2575	8.1	S
2	CIP396284.1	LTVR	1226	6.3	MS	805	2.6	R
2	CIP396285.1	LTVR	1399	7.2	S	1614	5.3	MR
2	CIP396286.6	LTVR	578	3	R	398	1.3	HR
2	CIP396286.7	LTVR	810	4.2	MR	446	1.5	HR
5	CIP396311.1	LTVR	3920	7.3	S	2720	7.3	S
4	CIP397006.18	LTVR	3504	8.6	S	2168	7.3	S
6	CIP397012.20	LTVR	2107	5.7	MS
5	CIP397012.22	LTVR	3385	6.3	MS	2481	6.7	S
6	CIP397014.2	LTVR	1488	3.7	R
4	CIP397016.7	LTVR	3884	9.4	HS	2423	8.1	S
4	CIP397029.21	LTVR	2251	5.1	MR	1906	6.3	MS
6	CIP397035.26	LTVR	2581	6.9	S
5	CIP397036.7	LTVR	3665	7.3	S	2513	7.9	S
5	CIP397039.51	LTVR	2934	5.8	MS	2641	8.3	S
5	CIP397039.53	LTVR	2772	5.1	MR	2110	5.6	MS
5	CIP397044.25	LTVR	3282	6.5	MS	2838	8.9	S
4	CIP397055.2	LTVR	3151	7.9	S	2278	7.7	S
4	CIP397060.19	LTVR	1814	4.7	MR	936	3.1	R
4	CIP397065.2	LTVR	2748	6.6	S	2075	6.9	S
4	CIP397065.28	LTVR	3108	7.9	S	2225	7.5	S
4	CIP397067.2	LTVR	2543	6.2	MS	1969	6.6	S
4	CIP397069.11	LTVR	3297	7.6	S	2249	7.6	S
4	CIP397069.5	LTVR	3407	8.2	S	2211	7.4	S
6	CIP397073.15	LTVR	1890	5	MR
5	CIP397073.16	LTVR	3872	7.3	S	2633	7.1	S
4	CIP397073.7	LTVR	3366	8	S	2132	7.2	S
3	CIP397077.16	LTVR	2818	7.4	S	1908	6.4	MS
6	CIP397078.12	LTVR	1479	3.8	R
4	CIP397079.26	LTVR	2967	6.8	S	1567	5.2	MR
4	CIP397079.6	LTVR	2698	6.6	S	2126	7.1	S
5	CIP397098.12	LTVR	3116	5.8	MS	2348	6.3	MS
5	CIP397099.4	LTVR	3006	5.6	MS	2581	6.9	S
4	CIP397100.9	LTVR	3255	7.3	S	2263	7.5	S
4	CIP397196.3	LTVR	2613	5.7	MS	1302	4.4	MR
3	CIP397196.8	LTVR	3664	8.8	S	2198	7.4	S
5	CIP397197.9	LTVR	3928	7.3	S	2630	7.1	S
7	CIP398017.53	LBHT-1	272	1	Rpi gene?
7	CIP398098.119	LBHT-1	0	0	Rpi gene?
7	CIP398098.203	LBHT-1	105	0.4	Rpi gene?
7	CIP398098.204	LBHT-1	0	0	Rpi gene?
7	CIP398098.205	LBHT-1	240	0.9	Rpi gene?
7	CIP398098.231	LBHT-1	0	0	Rpi gene?
7	CIP398098.570	LBHT-1	135	0.5	Rpi gene?
6	CIP398098.65	LBHT-1	842	2.2	HR
7	CIP398098.98	LBHT-1	91	0.3	Rpi gene?
7	CIP398180.144	LBHT-1	379	1.4	HR
7	CIP398180.253	LBHT-1	8	0	Rpi gene?
7	CIP398180.289	LBHT-1	75	0.3	Rpi gene?
7	CIP398180.292	LBHT-1	163	0.6	Rpi gene?
7	CIP398180.612	LBHT-1	151	0.6	Rpi gene?
6	CIP398190.112	LBHT-1	648	1.8	HR
6	CIP398190.200	LBHT-1	10	0	Rpi gene?
6	CIP398190.404	LBHT-1	323	0.8	Rpi gene?
6	CIP398190.523	LBHT-1	395	1.1	HR
6	CIP398190.571	LBHT-1	412	1.1	HR
6	CIP398190.605	LBHT-1	526	1.2	HR
6	CIP398190.615	LBHT-1	46	0.1	Rpi gene?
6	CIP398190.735	LBHT-1	321	0.8	Rpi gene?
7	CIP398190.89	LBHT-1	259	1	Rpi gene?
6	CIP398192.213	LBHT-1	602	1.6	HR
7	CIP398192.553	LBHT-1	466	1.8	HR
6	CIP398192.592	LBHT-1	576	1.5	HR
6	CIP398193.158	LBHT-1	592	1.5	HR
7	CIP398193.511	LBHT-1	140	0.5	Rpi gene?
7	CIP398193.553	LBHT-1	351	1.3	HR
7	CIP398193.650	LBHT-1	369	1.4	HR
7	CIP398201.510	LBHT-1	296	1.1	HR
7	CIP398203.244	LBHT-1	0	0	Rpi gene?
7	CIP398203.5	LBHT-1	345	1.3	HR
7	CIP398203.509	LBHT-1	69	0.3	Rpi gene?
7	CIP398208.219	LBHT-1	543	2.1	HR
6	CIP398208.29	LBHT-1	1099	2.8	R
7	CIP398208.33	LBHT-1	113	0.4	Rpi gene?
7	CIP398208.505	LBHT-1	11	0	Rpi gene?
7	CIP398208.58	LBHT-1	880	3.3	R
7	CIP398208.620	LBHT-1	91	0.3	Rpi gene?
7	CIP398208.670	LBHT-1	0	0	Rpi gene?
7	CIP398208.704	LBHT-1	0	0	Rpi gene?
5	CIP398211.35	LTVR	4261	8	S	2470	6.7	S
5	CIP399101.1	LTVR	3259	6.1	MS	2483	6.7	S
4	CIP500052.2	TPS	508	0.9	Rpi gene?	244	0.8	Rpi gene?
4	CIP500056.36	TPS	242	0.5	Rpi gene?	232	0.8	Rpi gene?
4	CIP500138.9	TPS	1721	4.1	MR	1042	3.4	R
4	CIP500139.5	TPS	2301	5.8	MS	1433	4.8	MR
4	CIP500140.1	TPS	622	1.3	HR	469	1.5	HR
4	CIP501034.2	TPS	410	0.8	Rpi gene?	267	0.9	Rpi gene?
4	CIP501049.3	TPS	302	0.6	Rpi gene?	436	1.4	HR
4	CIP501064.41	TPS	286	0.5	Rpi gene?	238	0.8	Rpi gene?
2	CIP595006.1	TPS	746	3.8	R	302	1	Rpi gene?
2	CIP595007.14	TPS	1298	6.7	S	503	1.6	HR
2	CIP595007.2	TPS	776	4	R	236	0.8	Rpi gene?
2	CIP595021.2	TPS	1121	5.7	MS	954	3.1	R
2	CIP595022.2	TPS	101	0.5	Rpi gene?	0	0	Rpi gene?
2	CIP595049.16	TPS	1361	7	S	818	2.7	R
2	CIP596002.7	TPS	769	3.9	R	149	0.5	Rpi gene?
2	CIP596006.41	TPS	353	1.8	HR	1676	5.5	MR
2	CIP596007.9	TPS	383	2	HR	1015	3.3	R
2	CIP596008.27	TPS	469	2.4	HR	1396	4.6	MR
2	CIP596013.17	TPS	304	1.6	HR	669	2.2	HR
2	CIP596013.25	TPS	345	1.8	HR	468	1.5	HR
2	CIP596013.29	TPS	488	2.5	HR	914	3	R
2	CIP596013.38	TPS	105	0.5	Rpi gene?	433	1.4	HR
2	CIP596018.1	TPS	908	4.7	MR	888	2.9	R
2	CIP596030.1	TPS	41	0.2	Rpi gene?	407	1.3	HR
2	CIP596063.2	TPS	1358	7	S	1501	4.9	MR
2	CIP596066.3	TPS	1024	5.3	MR	354	1.2	HR
2	CIP597035.3	TPS	675	3.5	R	333	1.1	HR
5	CIP598177.21	TPS	3415	6.9	S	2978	9.3	HS
4	CIP598264.20	TPS	2029	4.7	MR	1592	5.2	MR
3	CIP690005.10	PreBreeding	1783	4.2	MR	1328	4.4	MR
2	CIP693648.1	PreBreeding	1440	7.4	S	1934	6.3	MS
4	CIP693727.1	PreBreeding	1846	4.2	MR	1278	4.2	MR
2	CIP694474.15	PreBreeding	173	0.9	Rpi gene?	1348	4.4	MR
3	CIP694474.16	PreBreeding	1040	2.3	HR	869	2.9	R
2	CIP694474.30	PreBreeding	401	2.1	HR	1628	5.3	MR
5	CIP694474.33	PreBreeding	1026	1.8	HR	880	2.4	HR
2	CIP694474.41	PreBreeding	173	0.9	Rpi gene?	1028	3.4	R
4	CIP694474.43	PreBreeding	2218	5.5	MR	1752	5.8	MS
2	CIP694474.48	PreBreeding	799	4.1	MR	1492	4.9	MR
4	CIP694474.64	PreBreeding	1048	2	HR	1084	3.6	R
3	CIP694474.9	PreBreeding	1253	2.5	HR	933	3.1	R
4	CIP780630	PreBreeding	2898	8.2	S	1922	6.5	MS
Set	CIP Number	Cultivar Name	AUDPC	sAUDPC	AUDPC	sAUDPC	R
			AVG-ENV-1	AVG-ENV-1	AVG-ENV-2	AVG-ENV-2
1	-	Highly resistant					Highly resistant
1	-	Moderately resistant					Moderately resistant
1	-	Moderately susceptible					Moderately susceptible
1	-	Resistant	750	4	1387	3	Resistant
1	-	Susceptible	1230	6	2835	6	Susceptible
2	-	Highly resistant					Highly resistant
2	-	Moderately resistant					Moderately resistant
2	-	Moderately susceptible					Moderately susceptible
2	-	Resistant	735	4	1260	4	Resistant
2	-	Susceptible	1170	6	1838	6	Susceptible
3	CIP387164.4	LBr-40	280	0	55	0	Highly resistant
3	CIP720072	Tomasa Condemayta	3656	10	2549	9	Highly Susceptible
3	CIP384866.5	Amarilis INIA	2108	6	1084	3	Moderately resistant
3	CIP393371.157	B3C1	2224	6	1621	6	Moderately Susceptible
3	CIP720064	Yungay	2543	6	1915	6	Moderately susceptible
3	CIP720118	Cruza 148	879	2	602	2	Resistant
4	CIP387164.4	LBr-40	280	0	55	0	Highly resistant
4	CIP720072	Tomasa Condemayta	3656	10	2549	9	Highly Susceptible
4	CIP384866.5	Amarilis INIA	2108	6	1084	3	Moderately resistant
4	CIP393371.157	B3C1	2224	6	1621	6	Moderately Susceptible
4	CIP720064	Yungay	2543	6	1915	6	Moderately susceptible
4	CIP720118	Cruza 148	878.5	2	602	2	Resistant
5	CIP387164.4	LBr-40	124	0	581	1	Highly resistant
5	CIP720072	Tomasa Condemayta	4199	8	2891	8	Highly Susceptible
5	CIP384866.5	Amarilis INIA	2299	4	1550	4	Moderately resistant
5	CIP393371.157	B3C1	2478	5	1424	4	Moderately Susceptible
5	CIP720064	Yungay	3227	6	2259	6	Moderately susceptible
5	CIP720118	Cruza 148	922	2	799	2	Resistant
6	CIP384866.5	Amarilis INIA	1067	4			Moderately resistant
6	CIP387164.4	LBr-40	0	0			Highly resistant
6	CIP720064	Yungay	1823	6			Moderately susceptible
6	CIP720072	Tomasa Condemayta	2923	10			Highly Susceptible
6	CIP720118	Cruza 148	750	2			Resistant
6	CIP393371.157	Landeo	958	3
7	CIP384866.5	Amarilis INIA	2015	8			Moderately resistant
7	CIP720118	Cruza 148	392	1			Resistant
7	CIP387164.4	LBr-40	0	0			Highly resistant
7	CIP393371.157	Landeo	357	1
7	CIP720071	Monserrate	974	4
7	CIP720072	Tomasa Condemayta	3669	14			Highly Susceptible
7	CIP720064	Yungay	1587	6			Moderately susceptible
Panel	CIP800827	Atlantic
Panel	CIP393371.157	Landeo
Panel	CIP720072	Tomasa
Panel	CIP720118	Cruza 148
Panel	CIP384866.5	Amarilis
Panel	CIP720064	Yungay
Panel	CIP387164.4	LBr-40

## Sheet: solcap
													GG	GT	TT
												LB resistant	0	11	6
												LB susceptible	1	12	47
DNA \ Assay			snpST0023	solcap	snpST0023	solcap
		pheno	solcap_c2_56418	solcap_c2_56418	solcap_c2_56418	solcap_c2_56418		marker agreement
CIP397055.2	LTVR	S	?	AAAA	NA	hom		0
CIP395196.4	LTVR	MR	G:G	ABBB	hom	het		0
CIP391533.1	LTVR	HR	G:T	AAAA	het	hom		0
CIP392821.1	LTVR	HR	G:T	AAAB	het	het		1
CIP393617.1	LTVR	HR	G:T	AAAB	het	het		1
CIP397039.53	LTVR	MR	G:T	AAAB	het	het		1
CIP388615.22	LTVR	MR	G:T	AABB	het	het		1
CIP397012.22	LTVR	MS	G:T	AAAB	het	het		1
CIP380011.12	LB	R	G:T	AAAB	het	het		1
CIP385561.124	RKN	R	G:T	AAAB	het	het		1
CIP391065.69	LB	Rpi gene?	G:T	AAAB	het	het		1
CIP392617.54	LB	Rpi gene?	G:T	AAAB	het	het		1
CIP392637.27	LB	Rpi gene?	G:T	AAAB	het	het		1
CIP392657.171	LB	Rpi gene?	G:T	AAAB	het	het		1
CIP393371.164	LB	Rpi gene?	G:T	AAAB	het	het		1
CIP391583.25	LB	Rpi gene?	G:T	AABB	het	het		1
CIP389468.3	LTVR	S	G:T	AAAB	het	het		1
CIP392973.48	LTVR	S	G:T	AAAB	het	het		1
CIP394881.8	LTVR	S	G:T	AAAB	het	het		1
CIP395186.6	LTVR	S	G:T	AAAB	het	het		1
CIP395432.51	LTVR	S	G:T	AAAB	het	het		1
CIP396311.1	LTVR	S	G:T	AAAB	het	het		1
CIP397069.5	LTVR	S	G:T	AAAB	het	het		1
CIP397196.8	LTVR	S	G:T	AAAB	het	het		1
CIP397197.9	LTVR	S	G:T	AAAB	het	het		1
CIP391004.18	LB	HR	T:T	AAAA	hom	hom		1
CIP397016.7	LTVR	HS	T:T	AAAA	hom	hom		1
CIP300056.33	LTVR	MR	T:T	AAAA	hom	hom		1
CIP300066.11	LTVR	MR	T:T	AAAA	hom	hom		1
CIP300072.1	LTVR	MR	T:T	AAAA	hom	hom		1
CIP300101.11	LTVR	MR	T:T	AAAA	hom	hom		1
CIP392025.7	LTVR	MR	T:T	AAAA	hom	hom		1
CIP393708.31	LTVR	MR	T:T	AAAA	hom	hom		1
CIP394600.52	LTVR	MR	T:T	AAAA	hom	hom		1
CIP394613.139	LTVR	MR	T:T	AAAA	hom	hom		1
CIP395436.8	LTVR	MR	T:T	AAAA	hom	hom		1
CIP395448.1	BW	MR	T:T	AAAA	hom	hom		1
CIP397029.21	LTVR	MR	T:T	AAAA	hom	hom		1
CIP397073.15	LTVR	MR	T:T	AAAA	hom	hom		1
CIP391180.6	LTVR	MS	T:T	AAAA	hom	hom		1
CIP391930.1	BW	MS	T:T	AAAA	hom	hom		1
CIP392739.4	LTVR	MS	T:T	AAAA	hom	hom		1
CIP392759.1	LTVR	MS	T:T	AAAA	hom	hom		1
CIP394614.117	LTVR	MS	T:T	AAAA	hom	hom		1
CIP395195.7	LTVR	MS	T:T	AAAA	hom	hom		1
CIP397039.51	LTVR	MS	T:T	AAAA	hom	hom		1
CIP397099.4	LTVR	MS	T:T	AAAA	hom	hom		1
CIP397196.3	LTVR	MS	T:T	AAAA	hom	hom		1
CIP399101.1	LTVR	MS	T:T	AAAA	hom	hom		1
CIP394034.65	LTVR	R	T:T	AAAA	hom	hom		1
CIP394034.7	LTVR	R	T:T	AAAA	hom	hom		1
CIP397014.2	LTVR	R	T:T	AAAA	hom	hom		1
CIP397078.12	LTVR	R	T:T	AAAA	hom	hom		1
CIP394611.112	LTVR	Rpi gene?	T:T	AAAA	hom	hom		1
CIP300093.14	LTVR	S	T:T	AAAA	hom	hom		1
CIP379706.27	LTVR	S	T:T	AAAA	hom	hom		1
CIP388611.22	LTVR	S	T:T	AAAA	hom	hom		1
CIP390478.9	LTVR	S	T:T	AAAA	hom	hom		1
CIP390637.1	LTVR	S	T:T	AAAA	hom	hom		1
CIP391207.2	LTVR	S	T:T	AAAA	hom	hom		1
CIP391382.18	LTVR	S	T:T	AAAA	hom	hom		1
CIP392032.2	LTVR	S	T:T	AAAA	hom	hom		1
CIP392740.4	LTVR	S	T:T	AAAA	hom	hom		1
CIP392780.1	LTVR	S	T:T	AAAA	hom	hom		1
CIP392820.1	LTVR	S	T:T	AAAA	hom	hom		1
CIP393536.13	LTVR	S	T:T	AAAA	hom	hom		1
CIP393613.2	LTVR	S	T:T	AAAA	hom	hom		1
CIP393615.6	LTVR	S	T:T	AAAA	hom	hom		1
CIP394613.32	LTVR	S	T:T	AAAA	hom	hom		1
CIP395192.1	LTVR	S	T:T	AAAA	hom	hom		1
CIP395193.6	LTVR	S	T:T	AAAA	hom	hom		1
CIP395438.1	BW	S	T:T	AAAA	hom	hom		1
CIP397006.18	LTVR	S	T:T	AAAA	hom	hom		1
CIP397065.2	LTVR	S	T:T	AAAA	hom	hom		1
CIP397065.28	LTVR	S	T:T	AAAA	hom	hom		1
CIP397073.16	LTVR	S	T:T	AAAA	hom	hom		1
CIP397073.7	LTVR	S	T:T	AAAA	hom	hom		1
CIP397100.9	LTVR	S	T:T	AAAA	hom	hom		1
								75
								0.961538

## Sheet: typeI and II error
						Related calculations
						1. False positive rate (α) = type I error = 1 − specificity = FP / (FP + TN)
						2. False negative rate (β) = type II error = 1 − sensitivity = FN / (TP + FN)
						3. Power = sensitivity = 1 − β
		AA	G:A	G:G			alpha	0.103448
	PVY resistance	0	49	5	54		beta	0.0925926
	PVY Susceptible	0	3	26	29		power	0.907407
					83
	solcap marker	GG	GT	TT			alpha	0.216667
	LB resistant	0	11	6	17		beta	0.352941
	LB susceptible	1	12	47	60		power	0.647059
					77
	S9 marker	CC	AC	AA			alpha	0.0175439
	LB resistant	0	8	8	16		beta	0.125
	LB susceptible	1	0	56	57		power	0.875
					73
